# Supplementary material
Source: publisher site journal article supplement (https://www.dovepress.com/article/338212)
Supplement: Supplementary file 1 [file get_supplementary_file.php]

**Table S1.** Clinical characteristic of rCDI patients and donors.

| **Sample Number** |  | **Age** | **Sex** | **CRP (mg/dL)** | **Weight (kg)** | **Height (cm)** | **BMI (kg/m2)** | **Underlying Disease** | **Hospitalization** | **Antibiotic therapy in rCDI treatment** | **Concomitant therapy before FMT** | **Stool Consistency** | **CDI Severity** | **FMT Repeat** | **Donors Relation to Recipient** |
| --- | --- | --- | --- | --- | --- | --- | --- | --- | --- | --- | --- | --- | --- | --- | --- |
| 1 | Patient 1, Pre- FMT | 23 | Male | 17 | 108 | 190 | 29.6 | IBD (UC) | No | Vancomycin 125 mg given 4 times daily for 10 days | Anti-TNF alpha (infliximab) 40 mg/fortnight, Asacol tablets 3200 mg/day, one Asacol suppository every night, one Asacol enema every night | Watery-Bloody | Mild-to-moderate | 1 | Mother |
| 2 | Patient 1, Post- FMT, Second week |  | Male | 2 | 107 |  | 29.6 |  | No | Vancomycin 500 mg given 4 times daily for 10 days |  |  |  |  |  |
| 3 | Patient 1, Post- FMT, Eighth week |  | Male | 2 | 107 |  | 29.6 |  | No | Vancomycin 500 mg given 4 times daily for 10 days |  |  |  |  |  |
| 4 | Donor for patient 1 | 58 | Female |  |  |  |  |  |  |  |  |  |  |  |  |
| 5 | Patient 2, Pre- FMT | 52 | Male | 20.5 | 65 | 178 | 20.5 | IBD (UC) | No | Vancomycin 125 mg given 4 times daily for 10 days | Anti-TNF alpha (infliximab) 40 mg/fortnight, Asacol tablets 3200 mg/day, one Asacol suppository every night, one Asacol enema every night | Watery-Bloody | Mild-to-moderate | 1 | Cousin |
| 6 | Patient 2, Post- FMT, Second week |  | Male | 21.4 | 65 |  | 20.5 |  | No | Vancomycin 500 mg given 4 times daily for 10 days |  |  |  |  |  |
| 7 | Patient 2, Post- FMT, Eighth week |  | Male | 21 | 66 |  | 20.8 |  | No | Vancomycin 500 mg given 4 times daily for 10 days |  |  |  |  |  |
| 8 | Donor for patient 2 | 38 | Female |  |  |  |  |  |  |  |  |  |  |  |  |
| 9 | Patient 3, Pre- FMT | 45 | Male | 12 | 55 | 162 | 20.5 | IBD (UC) | No | Vancomycin 125 mg given 4 times daily for 10 days | Anti-TNF alpha (infliximab) 40 mg/fortnight, Asacol tablets 3200 mg/day, one Asacol suppository every night, one Asacol enema every night, Azathioprine tablet 200 mg/day | Watery | Mild-to-moderate | 2 | Brother |
| 10 | Patient 3, Post- FMT, Second week |  | Male | 10 | 64 |  | 21.4 |  | No | Vancomycin 500 mg given 4 times daily for 10 days |  |  |  |  |  |
| 11 | Patient 3, Post- FMT, Eighth week |  | Male | 10 | 64 |  | 21.4 |  | No | Vancomycin 500 mg given 4 times daily for 10 days |  |  |  |  |  |
| 12 | Donor for patient 3 | 40 | Female |  |  |  |  |  |  |  |  |  |  |  |  |
| 13 | Patient 3, Post- FMT, Four months later |  | Male | 8 | 64 |  | 21.4 |  | No |  |  |  |  |  |  |
| 14 | Donor for patient 3, Four months later |  | Female |  |  |  |  |  |  |  |  |  |  |  |  |
| 15 | Patient 4, Pre- FMT | 37 | Male | 14 | 63 | 178 | 19.8 | IBD (UC) | Yes | Vancomycin 125 mg given 4 times daily for 10 days | Anti-TNF alpha (infliximab) 40 mg/ fortnight, Azathioprine tablet 200 mg/day, Sulfasalazine 2000 mg/day | Watery-Bloody | Mild-to-moderate | 1 | Friend |
| 16 | Patient 4, Post- FMT, Second week |  | Male | 1 | 75 |  | 23.6 |  | Yes | Vancomycin 500 mg given 4 times daily for 10 days |  |  |  |  |  |
| 17 | Patient 4, Post- FMT, Eighth week |  | Male | 1 | 75 |  | 23.6 |  | Yes | Vancomycin 500 mg given 4 times daily for 10 days |  |  |  |  |  |
| 18 | Donor for patient 4 | 35 | Female |  |  |  |  |  |  |  |  |  |  |  |  |
| 19 | Patient 5, Pre- FMT | 33 | Male | 13 | 54 | 165 | 19.8 | IBD (UC) | No | Vancomycin 125 mg given 4 times daily for 10 days | Anti-TNF alpha (infliximab) 40 mg/fortnight, Asacol tablets 3200 mg/day, one Asacol suppository every night, one Asacol enema every night | Watery-Bloody | Mild-to-moderate | 1 | Brother |
| 20 | Patient 5, Post- FMT, Second week |  | Male | 7 | 56 |  | 20.5 |  | No | Vancomycin 500 mg given 4 times daily for 10 days |  |  |  |  |  |
| 21 | Patient 5, Post- FMT, Eighth week |  | Male | 7 | 56 |  | 20.5 |  | No | Vancomycin 500 mg given 4 times daily for 10 days |  |  |  |  |  |
| 22 | Donor for patient 5 | 37 | Male |  |  |  |  |  |  |  |  |  |  |  |  |
| 23 | Patient 6, Pre- FMT | 60 | Female | 12 | 68 | 168 | 24 | IBD (UC) | No | Vancomycin 125 mg given 4 times daily for 10 days | Anti-TNF alpha (infliximab) 40 mg/fortnight, Azathioprine tablet 200 | Watery | Mild-to-moderate | 1 | Son-in-law |
| 24 | Patient 6, Post- FMT, Second week |  | Female | 3 | 70 |  | 24.8 |  | No | Vancomycin 500 mg given 4 times daily for 10 days |  |  |  |  |  |
| 25 | Patient 6, Post- FMT, Eighth week |  | Female | 3 | 70 |  | 24.8 |  | No | Vancomycin 500 mg given 4 times daily for 10 days |  |  |  |  |  |
| 26 | Donor for patient 6 | 38 | Male |  |  |  |  |  |  |  |  |  |  |  |  |
| 27 | Patient 7, Pre- FMT | 24 | Male | 16 | 78 | 185 | 22.7 | IBD (UC) | No | Vancomycin 125 mg given 4 times daily for 10 days | Anti-TNF alpha (infliximab) 40 mg/fortnight, Asacol tablets 3200 mg/day, one Asacol suppository every night, one Asacol enema every night, Azathioprine tablet 200 mg/day | Watery | Mild-to-moderate | 2 | Father |
| 28 | Patient 7, Post- FMT, Second week |  | Male | 12 | 79 |  | 23 |  | No | Vancomycin 500 mg given 4 times daily for 10 days |  |  |  |  |  |
| 29 | Patient 7, Post- FMT, Eighth week |  | Male | 12 | 79 |  | 23 |  | No | Vancomycin 500 mg given 4 times daily for 10 days |  |  |  |  |  |
| 30 | Donor for patient 7 | 57 | Male |  |  |  |  |  |  |  |  |  |  |  |  |
| 31 | Donor for patient 7, Four months later |  | Male |  |  |  |  |  |  |  |  |  |  |  |  |
| 32 | Patient 8, Pre- FMT | 22 | Female | 11 | 50 | 165 | 18.3 | IBD (CD) | No | Vancomycin 125 mg given 4 times daily for 10 days | Anti-TNF alpha (infliximab) 40 mg/fortnight, Azathioprine tablet 200 mg/day | Watery | Mild-to-moderate | 1 | Sister |
| 33 | Patient 8, Post- FMT, Second week |  | Female | 3 | 50 |  | 18.7 |  | No | Vancomycin 500 mg given 4 times daily for 10 days |  |  |  |  |  |
| 34 | Patient 8, Post- FMT, Eighth week |  | Female | 3 | 50 |  | 18.7 |  | No | Vancomycin 500 mg given 4 times daily for 10 days |  |  |  |  |  |
| 35 | Donor for patient 8 | 25 | Female |  |  |  |  |  |  |  |  |  |  |  |  |


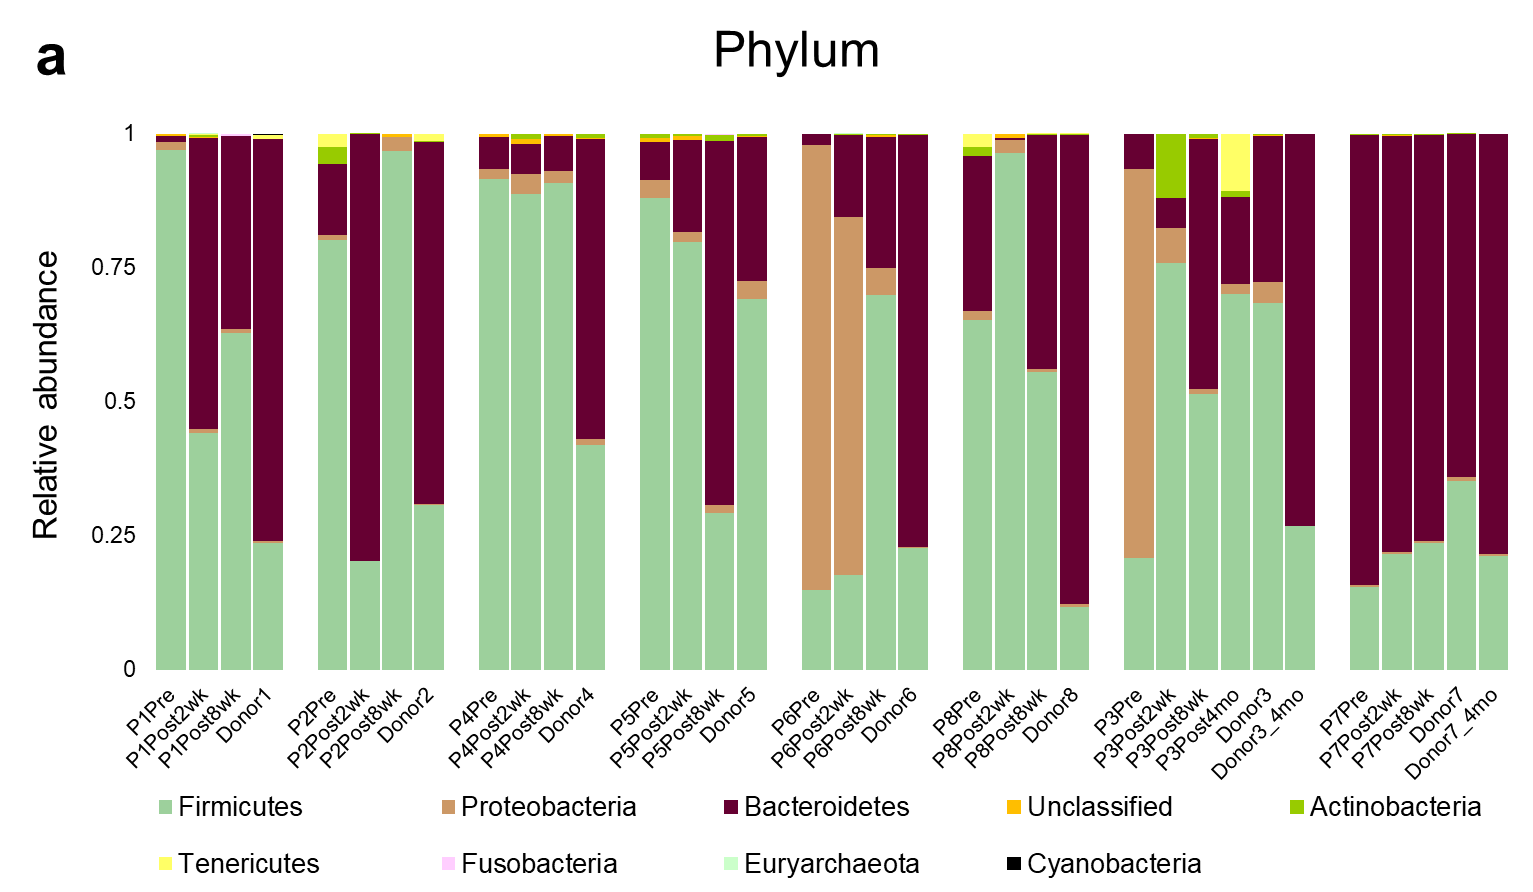


**
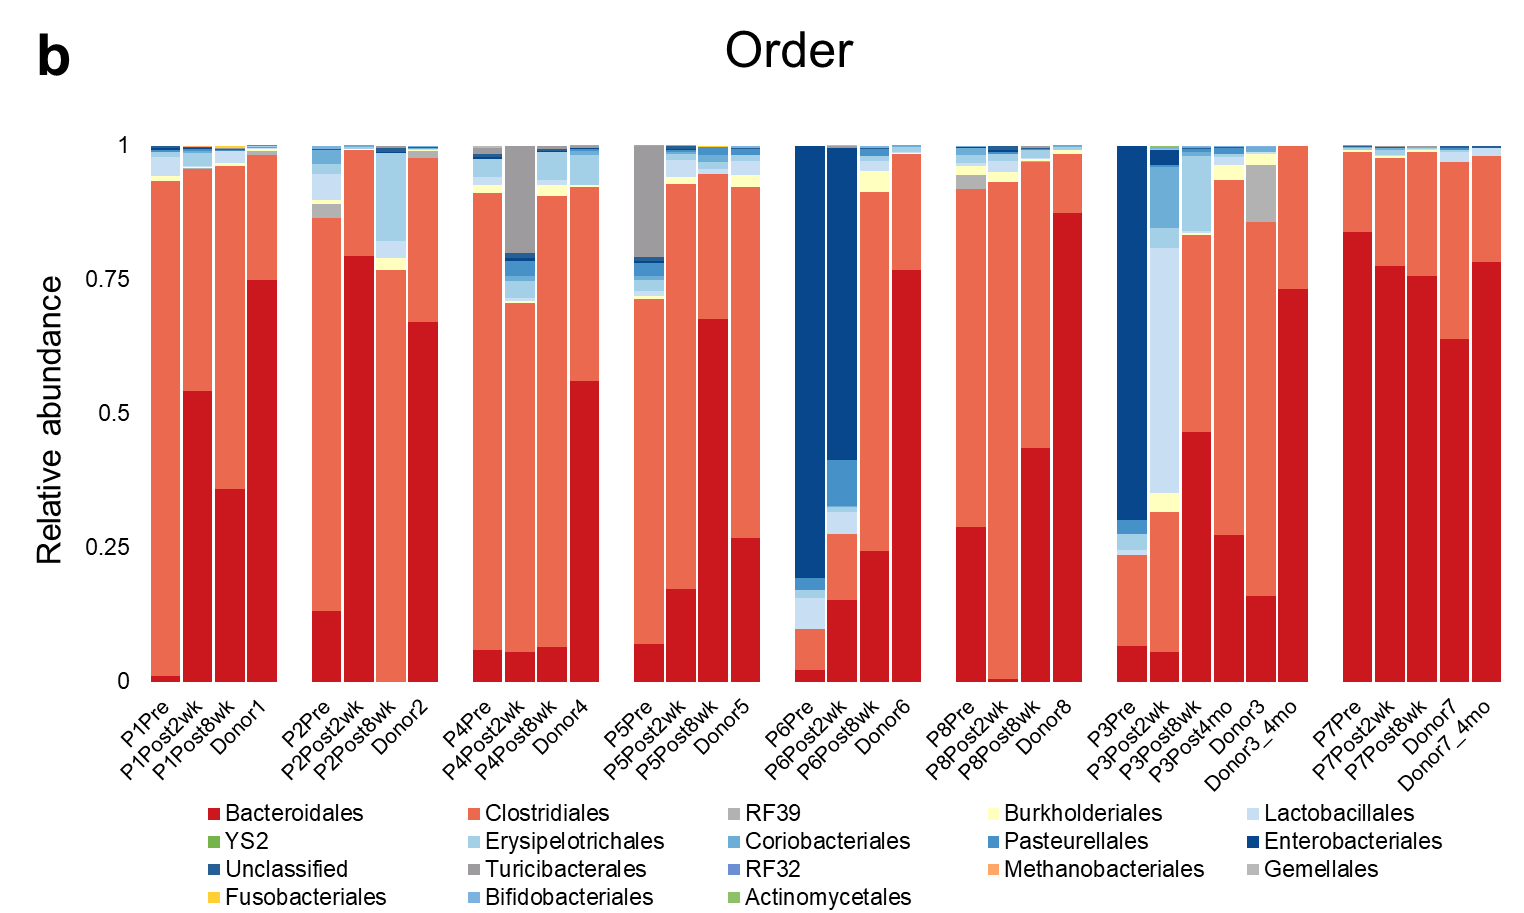
**

**Figure S1. a** Taxonomic classifications of individual rCDI patients at phylum level. **b** Taxonomic classifications of individual rCDI patients at order level. All of individual donor samples were described in order of the donor number (Donor'n'), and all the numbers of rCDI patients (P'n') were designated as those of donors.


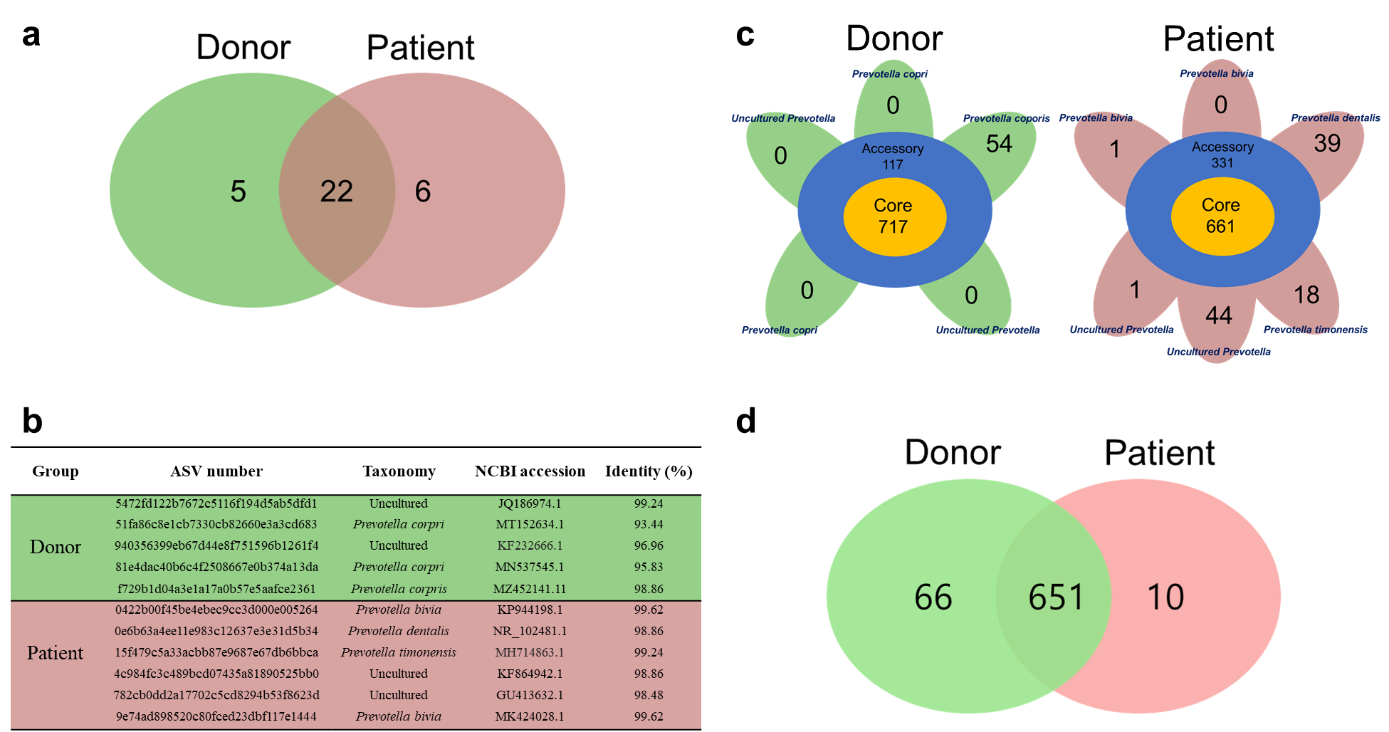


**Figure S2.** Comparison of functional genes in *Prevotella* in FMT donors and rCDI patients. **a** Classification of *Prevotella* ASVs into three groups by their sources: guts in donors, patients, and both of donor and patients respectively. The numbers of each ASV are represented on Venn diagram. **b** Table that comprises the information such as ASV number, Taxonomy, NCBI accession, and identity value of NCBI blast. The table was grouped by donor and patients group. **c** Result of pan-genome analysis among the *Prevotella* detectable in donors or patients. Left represents donor-specific detectable *Prevotella*, and right does patient-specific detectable *Prevotella*. Seven hundred seventeen(717) and 661 core genes are confirmed respectively. **d** Distribution of core genes in *Prevotella*. 651 core genes are observed in both donors and patients, 66 genes are detectable only in donors, and 10 genes are monitored in patients alone.

**Table S2.** List of core genes detected in donors alone. A total of 66 genes are descried with KEGG number, name, and description.

| **KEGG** | **Gene** | **Description** |
| --- | --- | --- |
| K00176 | korD, oorD | 2-oxoglutarate ferredoxin oxidoreductase subunit delta [EC:1.2.7.3] |
| K00177 | korC, oorC | 2-oxoglutarate ferredoxin oxidoreductase subunit gamma [EC:1.2.7.3] |
| K00278 | nadB | L-aspartate oxidase [EC:1.4.3.16] |
| K00558 | DNMT1, dcm | DNA (cytosine-5)-methyltransferase 1 [EC:2.1.1.37] |
| K00571 | E2.1.1.72 | site-specific DNA-methyltransferase (adenine-specific) [EC:2.1.1.72] |
| K00606 | panB | 3-methyl-2-oxobutanoate hydroxymethyltransferase [EC:2.1.2.11] |
| K00640 | cysE | serine O-acetyltransferase [EC:2.3.1.30] |
| K00656 | E2.3.1.54, pflD | formate C-acetyltransferase [EC:2.3.1.54] |
| K00661 | maa | maltose O-acetyltransferase [EC:2.3.1.79] |
| K00767 | nadC, QPRT | nicotinate-nucleotide pyrophosphorylase (carboxylating) [EC:2.4.2.19] |
| K00782 | lldG | L-lactate dehydrogenase complex protein LldG |
| K00820 | glmS, GFPT | glucosamine---fructose-6-phosphate aminotransferase (isomerizing) [EC:2.6.1.16] |
| K00826 | E2.6.1.42, ilvE | branched-chain amino acid aminotransferase [EC:2.6.1.42] |
| K00847 | E2.7.1.4, scrK | fructokinase [EC:2.7.1.4] |
| K00865 | glxK, garK | glycerate 2-kinase [EC:2.7.1.165] |
| **K00868** | **pdxK, pdxY** | **pyridoxine kinase [EC:2.7.1.35]** |
| K00949 | thiN, TPK1, THI80 | thiamine pyrophosphokinase [EC:2.7.6.2] |
| K01079 | serB, PSPH | phosphoserine phosphatase [EC:3.1.3.3] |
| K01153 | hsdR | type I restriction enzyme, R subunit [EC:3.1.21.3] |
| K01154 | hsdS | type I restriction enzyme, S subunit [EC:3.1.21.3] |
| K01246 | tag | DNA-3-methyladenine glycosylase I [EC:3.2.2.20] |
| K01322 | PREP | prolyl oligopeptidase [EC:3.4.21.26] |
| K01579 | panD | aspartate 1-decarboxylase [EC:4.1.1.11] |
| K01609 | trpC | indole-3-glycerol phosphate synthase [EC:4.1.1.48] |
| K01658 | trpG | anthranilate synthase component II [EC:4.1.3.27] |
| K01665 | pabB | para-aminobenzoate synthetase component I [EC:2.6.1.85] |
| K01744 | aspA | aspartate ammonia-lyase [EC:4.3.1.1] |
| K01858 | INO1, ISYNA1 | myo-inositol-1-phosphate synthase [EC:5.5.1.4] |
| K01918 | panC | pantoate--beta-alanine ligase [EC:6.3.2.1] |
| **K02217** | **ftnA, ftn** | **ferritin [EC:1.16.3.2]** |
| K02346 | dinB | DNA polymerase IV [EC:2.7.7.7] |
| K02477 | K02477 | two-component system, LytTR family, response regulator |
| K02619 | pabC | 4-amino-4-deoxychorismate lyase [EC:4.1.3.38] |
| K03147 | thiC | phosphomethylpyrimidine synthase [EC:4.1.99.17] |
| K03332 | fruA | fructan beta-fructosidase [EC:3.2.1.80] |
| K03427 | hsdM | type I restriction enzyme M protein [EC:2.1.1.72] |
| K03455 | TC.KEF | monovalent cation:H+ antiporter-2, CPA2 family |
| K03517 | nadA | quinolinate synthase [EC:2.5.1.72] |
| K03612 | rnfG | electron transport complex protein RnfG |
| K03768 | PPIB, ppiB | peptidyl-prolyl cis-trans isomerase B (cyclophilin B) [EC:5.2.1.8] |
| K03885 | ndh | NADH dehydrogenase [EC:1.6.99.3] |
| K04069 | pflA, pflC, pflE | pyruvate formate lyase activating enzyme [EC:1.97.1.4] |
| K04764 | ihfA, himA | integration host factor subunit alpha |
| K05516 | cbpA | curved DNA-binding protein |
| K05601 | hcp | hydroxylamine reductase [EC:1.7.99.1] |
| K06872 | K06872 | uncharacterized protein |
| K06889 | K06889 | uncharacterized protein |
| K06926 | K06926 | uncharacterized protein |
| K06959 | tex | protein Tex |
| K07005 | K07005 | uncharacterized protein |
| K07024 | SPP | sucrose-6-phosphatase [EC:3.1.3.24] |
| K07139 | K07139 | uncharacterized protein |
| K07154 | hipA | serine/threonine-protein kinase HipA [EC:2.7.11.1] |
| K07213 | ATOX1, ATX1, copZ, golB | copper chaperone |
| K07240 | chrA | chromate transporter |
| K07316 | mod | adenine-specific DNA-methyltransferase [EC:2.1.1.72] |
| K08307 | mltD, dniR | membrane-bound lytic murein transglycosylase D [EC:4.2.2.-] |
| K08641 | vanX | zinc D-Ala-D-Ala dipeptidase [EC:3.4.13.22] |
| K08998 | K08998 | uncharacterized protein |
| K09607 | ina | immune inhibitor A [EC:3.4.24.-] |
| K11921 | cynR | LysR family transcriptional regulator, cyn operon transcriptional activator |
| K13038 | coaBC, dfp | phosphopantothenoylcysteine decarboxylase / [EC:4.1.1.36 6.3.2.5] |
| K13993 | HSP20 | HSP20 family protein |
| K16053 | ybdG, mscM | miniconductance mechanosensitive channel |
| K18928 | lldE | L-lactate dehydrogenase complex protein LldE |
| K18929 | lldF | L-lactate dehydrogenase complex protein LldF |
